1 ***In vivo* diversification of target genomic sites using processive T7**  
2 **RNA polymerase-base deaminase fusions blocked by RNA-guided**  
3 **dCas9**

4  
5

6 **Beatriz Álvarez<sup>1</sup>, Mario Mencía<sup>2</sup>, Víctor de Lorenzo<sup>3</sup> and Luis Ángel Fernández<sup>1\*</sup>**

7

8 (1) *Department of Microbial Biotechnology and (3) Systems Biology Program, Centro Nacional*  
9 *de Biotecnología, Consejo Superior de Investigaciones Científicas (CNB-CSIC), Darwin 3,*  
10 *Campus UAM Cantoblanco, 28049 Madrid, Spain.*

11

12 (2) *Centro de Biología Molecular “Severo Ochoa” (Consejo Superior de Investigaciones*  
13 *Científicas – Universidad Autónoma de Madrid), Nicolas Cabrera 1, Campus UAM Cantoblanco,*  
14 *28049 Madrid, Spain*

15

16

17 **Running Title:** Processive base deaminase fusions blocked by dCas9

18

19

20 **Keywords:** base deaminases, dCas9, directed evolution, in vivo mutagenesis, T7 RNA  
21 polymerase

22

23

---

24 \* **Corresponding author:** Dr. Luis Ángel Fernández  
25 E-mail: [lafdez@cnb.csic.es](mailto:lafdez@cnb.csic.es)  
26 Phone: +34 91 585 4854  
27 Fax: +34 91 585 4506

28

29

30

## 31 **Abstract**

32

33 Diversification of specific DNA segments typically involve *in vitro* generation of large sequence  
34 libraries and their introduction in cells for selection. Alternative *in vivo* mutagenesis systems on  
35 cells often show deleterious offsite mutations and restricted capabilities. To overcome these  
36 limitations, we have developed an *in vivo* platform to diversify specific DNA segments based on  
37 protein fusions between various base deaminases (BD) and the T7 RNA polymerase (T7RNAP)  
38 that recognizes a cognate promoter oriented towards the target sequence. The transcriptional  
39 elongation of these fusions generates transitions C to T or A to G on both DNA strands and in  
40 long DNA segments. To delimit the boundaries of the diversified DNA, the catalytically dead  
41 Cas9 (dCas9) is tethered with custom-designed crRNAs as a “roadblock” for BD-T7RNAP  
42 elongation. While the efficiency of this platform is demonstrated in *E. coli*, the system can be  
43 adapted to a variety of bacterial and eukaryotic hosts.

44

45

46

47

48

49

50

51

52

53

54

55

56

57

## 58 Introduction

59 Directed evolution enables the selection of protein variants with improved properties as  
60 therapeutics and biocatalysts<sup>1,2,3</sup>. The generation of genetic variability followed by a screening  
61 process are the essential steps of directed evolution<sup>4,5</sup>. *In vitro* mutagenesis techniques (e.g.,  
62 error-prone PCR) can quickly produce large number of variants of the target gene but their  
63 selection requires, in most cases, cloning and transformation into a host cell for expression (e.g.,  
64 *E. coli*). These steps are time-consuming and labor-intensive, especially when iterative cycles  
65 of mutagenesis and selection are needed. Cell-free selection methods are also feasible<sup>6</sup>, but  
66 they are technically demanding and functional expression of complex proteins (e.g. membrane  
67 proteins, multimeric enzymes) is often difficult to achieve. Hence, *in vivo* mutagenesis systems  
68 are preferred because the generation of genetic variants, their expression and selection can  
69 done in a continuous process, which accelerates directed evolution<sup>5,7</sup>.

70

71 Long-established *in vivo* mutagenesis methods (e.g., chemical mutagens, radiations) do not  
72 target specific genes and are deleterious for the host cell due to accumulation of random  
73 mutations in the genome<sup>8</sup>. Similarly, "mutator" host strains do not allow the concentration of the  
74 mutagenic activity on the target gene, inducing the accumulation of unwanted mutations in the  
75 host genome<sup>9,10,11,12</sup>. A few *in vivo* mutagenesis systems with targeted specificity have been  
76 reported for *E. coli* and yeast cells, which are the preferred hosts for cloning and expression of  
77 gene libraries<sup>5</sup>. For example, an error-prone variant of *E. coli* DNA polymerase I enables the  
78 mutagenesis of cloned genes in ColE1 plasmids, although it concentrates the mutations close  
79 to the origin of replication<sup>13</sup>. A different approach involves the transformation of *E. coli* with  
80 mutant oligonucleotide libraries, targeting one or multiple loci in the chromosome, which induce  
81 mutation during DNA replication *in vivo*<sup>14,15,16</sup>. These systems allow multiloci genome  
82 engineering, but also imply iterative cycles of transformation with oligonucleotide libraries  
83 followed by high-throughput screenings, often including massive DNA sequencing steps, which  
84 are labor-intensive and demand sophisticated equipment. In yeast, generation variability can be  
85 achieved by cloning the target DNA segments in retrotransposons having an error-prone

86 retrotranscriptase <sup>17</sup>, but this process is limited to the DNA size that can be cloned in the  
87 retrotransposon (<5 kb).

88

89 A more versatile mutagenic system for different hosts is based on the tethering of base  
90 deaminases (BDs), such as cytosine deaminases (CDs) and adenosine deaminases (ADs), to  
91 a target DNA using catalytically dead Cas9 (dCas9) or analogous enzymes targeted with a  
92 CRISPR RNA (crRNA) or guide RNA (gRNA) <sup>18, 19, 20, 21</sup>. Previous studies had shown that  
93 expression of CDs, such as human AID and orthologs from rat (rAPOBEC1) and lamprey  
94 (pmCDA1), induce random C to T mutations *in vivo*, both in *E. coli* and yeast. These CDs  
95 increase the frequency of C:G to T:A base pair transitions in DNA, especially when uracil DNA  
96 N-glycosylase (UNG) activity is inactivated by gene deletion or by the specific inhibitor UGI <sup>22, 23, 24,</sup>  
97 <sup>25</sup>. This is because cytosine deamination produces uracil in DNA that can be eliminated by UNG,  
98 generating an abasic DNA that is a substrate of the base-excision repair system <sup>26, 27</sup>. When a  
99 CD is fused to dCas9, its mutagenic activity is tethered to the target DNA sequence hybridized  
100 by the crRNA (or gRNA) allowing edition of specific bases in the genome <sup>18, 19, 20, 21</sup>. In addition,  
101 mutations of A to G (inducing A:T to G:C base pairs transitions) have been generated by fusing  
102 dCas9 to an engineered AD named TadA\*, derived from the endogenous RNA-dependent AD  
103 TadA of *E. coli* <sup>28</sup>. Fusions of these BDs to dCas9 provides precise molecular tools for edition of  
104 specific bases in the genome, but its lack of processivity limits its potential for directed evolution  
105 of complete genes and operons. An interesting alternative is the use of a nickase Cas9  
106 (nCas9) fused to an error-prone DNA polymerase that is able to introduce mutations in a DNA  
107 segment of up to 350 bp <sup>29</sup>, which is still limited for long genes and operons.

108

109 Hence, despite the above-mentioned advancements, the development of *in vivo* mutagenesis  
110 systems with high specificity and processivity are of great interest. In this study we report a novel  
111 approach that fulfill these criteria enabling *in vivo* mutagenesis of a target gene using different  
112 highly processive protein fusions of BDs and the bacteriophage T7 RNA polymerase (T7RNAP).  
113 The specificity of the mutagenesis is provided by a distinct T7RNAP promoter (P<sub>T7</sub>) driving  
114 transcription through the target DNA. By placing the P<sub>T7</sub> at the 3'-end of the target gene, in

115 reverse orientation, expression of the target gene can be preserved from its endogenous 5'-  
116 promoter recognized by the host RNAP. We report the mutagenic action of fusions of T7RNAP  
117 with different BDs (i.e., AID, rAPOBEC1, pmCDA1 and TadA\*) on a target genomic DNA  
118 segment and show that the DNA-bound crRNA/dCas9 complex hinders elongation BD-T7RNAP  
119 hybrids, protecting the downstream DNA. Given the demonstrated functionality of BDs, T7RNAP  
120 and dCas9 in different hosts (e.g., bacteria, yeast, mammalian cells)<sup>18, 19, 21, 30, 31, 32</sup>, this system  
121 has the potential to be implemented in diverse organisms other than *E. coli*.

122

## 123 **Results**

124 *An E. coli reporter strain of the mutagenic and transcriptional activity of BD-T7RNAP fusions.* A  
125 scheme of the overall strategy followed in this study is shown in Fig. 1. To measure both the  
126 mutagenic and transcriptional activity of BD-T7RNAP fusions, we designed a GFP-URA3  
127 genetic cassette comprising two gene reporters in reverse orientation: a promoter-less *gfp* gene  
128 and the URA3 gene from *Saccharomyces cerevisiae* (Fig 2a). Transcription of the URA3 gene  
129 was placed under the Ptac promoter recognized by *E. coli* RNAP. Yeast URA3 encodes the  
130 enzyme orotidine 5'-phosphate decarboxylase involved in the synthesis of uridine  
131 monophosphate (UMP)<sup>33</sup>. The activity of URA3, and that of the *E. coli* orthologue *pyrF*, allows  
132 cell growth in the absence of uracil in the medium (positive selection). In addition, URA3  
133 expression makes yeast and *E. coli* cells sensitive to 5'-Fluororotic acid (FOA) allowing selection  
134 of null mutants (negative selection or counterselection)<sup>34, 35</sup>. To enable specific recruitment of  
135 BD-T7RNAP fusions, the promoter P<sub>T7</sub> was placed downstream of URA3, in reversed orientation  
136 to the coding sequence of URA3, but in the same orientation that the promoter-less *gfp* gene  
137 (Fig. 2a). Thus, expression of GFP acts as a reporter of the transcriptional activity of BD-  
138 T7RNAP fusions. The GFP-URA3 cassette was flanked by transcriptional terminators (T1 and  
139 T0). The whole genetic construct was cloned in an integrative suicide vector carrying an  
140 apramycin-resistance marker (Apra<sup>R</sup>) and flanking homology regions of the *flu* gene of *E. coli* K-  
141 12, encoding Antigen 43<sup>36</sup>. Integration of genetic constructs replacing *flu* does not affect  
142 bacterial growth and viability<sup>37, 38</sup>. The *E. coli* K-12 strain used for integration was derived from  
143 the reference strain MG1655<sup>39, 40</sup> by correcting using recombineering a natural mutation that

144 reduces the expression of *pyrE*<sup>41</sup> (Supplementary Fig. 1a). The *pyrE* gene encodes the enzyme  
145 orotate phosphoribosyltransferase required for the biosynthesis of UMP and the incorporation  
146 of FOA to produce the toxic 5-FUMP. The strain with the corrected *pyrE* allele (named MG1655\*)  
147 showed higher sensitivity to FOA than the parental MG1655 strain (Supplementary Fig 1b).  
148 Deletion of *pyrF* in MG1655\* makes bacteria resistant to FOA (Supplementary Fig. 1b). The  
149 GFP-URA3 cassette was integrated in the chromosome of MG1655\* $\Delta$ *pyrF* generating the  
150 reporter strain MG\*-URA3, which grows well in mineral media (M9) lacking uracil and is highly  
151 sensitive to FOA (Supplementary Fig. 1b). Lastly, an *ung* deletion mutant was obtained in this  
152 strain (MG\*-URA3 $\Delta$ *ung*).

153

154 *Expression and activity of T7RNAP fusions to human AID.* We first investigated the tolerance of  
155 T7RNAP (~99 kDa) for N- and C-terminal protein fusions using the human CD AID (~24 kDa)<sup>22</sup>,  
156 <sup>24</sup>. AID was fused at the N- and C-terminal ends of T7RNAP using a flexible peptide linker of Gly  
157 and Ser (G3S)<sub>7</sub>, generating AID-T7RNAP and T7RNAP-AID fusions, respectively (Fig. 2b). In  
158 addition, variants of AID-T7RNAP were constructed with different N-terminal tags: thioredoxin 1  
159 (TrxA; ~11 kDa) and a cytosolic version of the maltose binding protein (MBPc; ~40 kDa),  
160 generating TrxA-AID-T7RNAP and MBPc-AID-T7RNAP, respectively (Fig. 2b). N-terminal TrxA  
161 and MBPc are reported to increase the solubility and expression level of protein fusions in *E.*  
162 *coli*<sup>42, 43, 44, 45</sup>. Gene constructs encoding T7RNAP and AID fusions were placed under the control  
163 of the tetracycline-regulated promoter (TetR-PtetA)<sup>46, 47</sup> in a low copy-number plasmid  
164 (pSEVA221)<sup>48</sup>. MG\*-URA3 $\Delta$ *ung* bacteria harboring these plasmids, and pSEVA221 as negative  
165 control, were grown at 37 °C in LB for 2 h (OD<sub>600</sub> ~1.0), and induced with anhydrotetracycline  
166 (aTc) for additional 1 h. All cultures grew to a similar final optical density (OD<sub>600</sub> ~2.5), except  
167 bacteria expressing native T7RNAP (OD<sub>600</sub> ~1.2) suggesting some toxicity of T7RNAP  
168 expression. Whole-cell protein extracts from these cultures were analyzed by Western blot with  
169 a monoclonal antibody (mAb) anti-T7RNAP (Fig. 2c). Protein bands corresponding to the  
170 expected size of full-length fusions and T7RNAP were detected in bacteria expressing all N-  
171 terminal AID fusions, albeit higher levels were found with MBPc-AID-T7RNAP. In the case of  
172 the C-terminal fusion T7RNAP-AID, multiple protein bands were visible corresponding to

173 T7RNAP and truncated polypeptides derived from the fusion, but none corresponding to the full-  
174 length polypeptide (Fig. 2c). GFP expression was detected by flow cytometry in bacteria with  
175 native T7RNAP and all N-terminal AID fusions, but not in bacteria expressing the C-terminal  
176 fusion of AID or carrying the empty vector (Fig. 2d). GFP fluorescence was ca. 2-fold higher in  
177 bacteria expressing native T7RNAP than in bacteria expressing any of the N-terminal AID  
178 fusions (Fig. 2d). Therefore, N-terminal fusions to T7RNAP produce a transcriptionally active  
179 polypeptide in *E. coli*, whereas C-terminal fusions are not stable and transcriptionally inactive.

180

181 To test the mutagenic activity of the transcriptionally active fusions, cultures of MG<sup>\*</sup>-URA3 $\Delta$ ung  
182 bacteria carrying plasmid constructs encoding none (empty vector control), AID-T7RNAP, TrxA-  
183 AID-T7RNAP, and MBPc-AID-T7RNAP, were grown and induced as above. After induction,  
184 bacteria were plated on M9+uracil and M9+uracil+FOA to determine colony forming units  
185 (CFU/ml) in each media. The mutation frequency of URA3 was determined for each bacterial  
186 strain in three independent experiments as the ratio of FOA<sup>R</sup> CFU/ml vs. total CFU/ml (Fig. 2e).  
187 These data revealed a significant increase (~1000-fold) in the frequency of FOA<sup>R</sup> bacteria  
188 (URA3 mutants) in cultures expressing AID fusions (~10<sup>-3</sup>) compared to negative control  
189 bacteria (~10<sup>-6</sup>). Interestingly, expression of native T7RNAP alone increased ~20-fold (~2x10<sup>-5</sup>)  
190 the frequency of URA3 mutants, suggesting some mutagenic activity caused by high-level  
191 transcription of URA3 and/or by the toxicity of T7RNAP overexpression, which also caused a  
192 ~10-fold reduction in the total CFU/ml (Fig. 2f). In contrast, bacterial cultures expressing AID  
193 fusions did not show any significant change in total CFU/ml, with values similar to the control  
194 strain (~10<sup>9</sup> CFU/ml) (Fig. 2f). Hence, the high-frequency of URA3 mutants found in bacteria  
195 with AID fusions strongly suggests a mutagenic activity of the fusion polypeptides.

196

197 To evaluate the specificity of the mutagenic AID-T7RNAP fusions, bacteria from the above  
198 cultures were also plated on rifampicin (Rif)-containing plates. Rif<sup>R</sup> colonies of *E. coli* are known  
199 to contain mutations in *rpoB*, encoding the  $\beta$ -subunit of *E. coli* RNAP<sup>49, 50</sup>. The frequency of  
200 mutation in *rpoB* was determined for each culture as the ratio of Rif<sup>R</sup> CFU/ml vs. total CFU/ml  
201 (Fig. 2g). These data revealed a ~5-fold increase in the frequency of *rpoB* mutants in bacteria



202 expressing AID fusions ( $\sim 10^{-6}$ ) compared to the negative control or bacteria expressing native  
203 T7RNAP ( $\sim 2 \times 10^{-7}$ ) (Fig. 2g). These data are in accordance with previous work showing that  
204 expression of AID slightly increases the mutagenesis of non-specific loci in *E. coli*  $\Delta ung$  strains  
205 <sup>24</sup>. However, this low non-specific mutagenic activity of AID-T7RNAP fusions is clearly  
206 insufficient to explain the  $\sim 1000$ -fold increase in URA3 mutants, suggesting a strong specificity  
207 of AID-T7RNAP fusions for the mutagenesis of URA3.

208

209 *Mutagenic activity of different CDs fused to the N-terminus of T7RNAP.* Since all fusions having  
210 AID at the N-terminal of T7RNAP showed similar transcriptional and mutagenic activities (Fig.  
211 2), we chose the AID-T7RNAP fusion, lacking any additional protein partner, to continue our  
212 work. We constructed similar N-terminal fusions with other CDs, namely pmCDA1 and  
213 rAPOBEC1 (Fig. 3a). As for AID, pmCDA1 and rAPOBEC1 fusions were also cloned in  
214 pSEVA221 under the control of TetR-PtetA. MG<sup>\*</sup>-URA3 $\Delta ung$  bacteria carrying pSEVA221  
215 (negative control) or plasmids encoding T7RNAP, AID-T7RNAP, pmCDA1-T7RNAP, and  
216 rAPOBEC1-T7RNAP, were induced with aTc. Western blot analysis of whole-cell protein  
217 extracts from these cultures revealed similar expression levels of the fusion proteins, and higher  
218 expression of native T7RNAP (Fig. 3b), as before. Flow cytometry analysis also showed similar  
219 levels of GFP expression in bacteria encoding AID, pmCDA1 and rAPOBEC1 fusions, with MFI  
220 values roughly half of those found in bacteria expressing native T7RNAP (Fig. 3c). Hence, as  
221 for AID-T7RNAP, fusions pmCDA1-T7RNAP and rAPOBEC1-T7RNAP were transcriptionally  
222 active in *E. coli*.

223

224 Next, we determined the frequency of mutagenesis in URA3 and *rpoB* loci upon induction of  
225 bacterial cultures carrying pSEVA221 (empty vector) or derivatives encoding native T7RNAP,  
226 AID-, pmCDA1- and rAPOBEC1- fusions, in three different *E. coli* strains: MG<sup>\*</sup>-URA3 (*ung*<sup>+</sup>),  
227 MG<sup>\*</sup>-URA3 $\Delta ung$ , and MG<sup>\*</sup>-URA3 $\Delta ung\Delta P_{T7}$  (lacking the P<sub>T7</sub> in URA3). The ratio of FOA<sup>R</sup> CFU/ml  
228 and Rif<sup>R</sup> CFU/ml vs. total CFU/ml for each induced culture was determined in three independent  
229 experiments (Fig. 3d). This analysis showed a significant increase in the mutagenesis of the  
230 URA3 locus for all CD fusions in  $\Delta ung$  bacteria and in the presence of P<sub>T7</sub>. As expected from



231 previous data (Fig. 2), the frequency of URA3 mutants in MG\*-URA3 $\Delta$ ung bacteria was  $\sim 10^{-3}$   
232 for AID-T7RNAP,  $\sim 10^{-5}$  for native T7RNAP, and  $\sim 10^{-6}$  for the empty vector, but increased  
233 dramatically to  $\sim 5 \times 10^{-2}$  for rAPOBEC1-T7RNAP and to  $\sim 10^{-1}$  for pmCDA1-T7RNAP. Thus,  
234 rAPOBEC1 and pmCDA1 fusions have a higher mutagenic activity than AID fusion ( $\sim 50$ - to  $100$ -  
235 fold, respectively). The higher activity of rAPOBEC1 and pmCDA1 was also partially reflected in  
236 a slightly higher "off-target" mutagenesis in *rpoB* (Fig. 3d). Importantly, the frequency of URA3  
237 mutants for all CD fusions dropped to levels close to those of the empty vector in the strain  
238 lacking the T7 promoter (MG\*-URA3 $\Delta$ ung $\Delta$ P<sub>T7</sub> strain). Hence, these data clearly indicate that  
239 the strong mutagenic activity of CD-T7RNAP fusions in URA3 requires the presence of P<sub>T7</sub>. The  
240 requirement of P<sub>T7</sub> is also seen for the mutagenic activity of native T7RNAP in URA3 (Fig. 3d).  
241 Lastly, we found that all CD fusions have a lower mutagenic activity in the *ung*<sup>+</sup> strain whereas  
242 the mutagenic activity of native T7RNAP is independent of the presence of UNG (Fig. 3d). Not  
243 surprisingly, the highly active pmCDA1 fusion also showed the highest mutagenic frequency of  
244 URA3 in the *ung*<sup>+</sup> strain, with a 100-fold increase compared to the control with the empty vector  
245 (frequency  $\sim 10^{-4}$  vs.  $\sim 10^{-6}$ ). A moderate increase of  $\sim 5$  to 10-fold in the frequency of URA3  
246 mutants was found in the *ung*<sup>+</sup> strain for AID and rAPOBEC1 fusions, respectively (Fig. 3d).

247

248 *Mutagenic activity of an adenosine deaminase (AD) fusion to T7RNAP.* To broaden the capacity  
249 of the mutagenesis system to adenosine bases, a T7RNAP fusion was constructed with the  
250 modified AD TadA7.10 (TadA\*)<sup>28</sup> (Fig. 4a). TadA\* was shown to deaminate adenines in DNA  
251 generating inosines that leads to A:T > G:C transitions. The fusion TadA\*-T7RNAP was  
252 expressed in MG\*-URA3 $\Delta$ ung at higher levels than AID-T7RNAP, as determined by Western-  
253 blot (Fig. 4b). The TadA\*-T7RNAP fusion was also transcriptionally active, producing slightly  
254 higher levels of GFP than AID-T7RNAP (Fig. 4c). The potential mutagenic capacity of TadA\*-  
255 T7RNAP was evaluated in different genetic backgrounds, using AID-T7RNAP as a positive  
256 mutagenesis control and pSEVA221 vector as a negative control (Fig. 4d). These experiments  
257 revealed that expression of TadA\*-T7RNAP generates URA3 mutants with a frequency of  $\sim 2$ -  
258  $5 \times 10^{-4}$  ( $\sim 100$ -fold higher than the negative control) in both MG\*-URA3(*ung*<sup>+</sup>) and MG\*-  
259 URA3 $\Delta$ ung strains, indicating that TadA\* fusion is mutagenic and, contrary to AID-T7RNAP,

260 independent of the presence of the enzyme UNG (Fig. 4d). In *E. coli* K-12 the gene *nfi* encodes  
261 endonuclease V, which is involved in inosine elimination<sup>51, 52</sup>. When TadA\*-T7RNAP was  
262 expressed in *E. coli* strains lacking *nfi* (MG\*-URA3 $\Delta$ *nfi* and MG\*-URA3 $\Delta$ *ung* $\Delta$ *nfi*), the frequency  
263 of URA3 mutants further increased to  $\sim 10^{-3}$ , a level similar to that generated by AID-T7RNAP in  
264 the  $\Delta$ *ung* mutant (Fig. 4d). In contrast, deletion of *nfi* had no effect over the mutagenesis  
265 frequency of AID-T7RNAP (Fig. 4d). In addition, expression of TadA\*-T7RNAP did not produce  
266 any significant increase in the levels of off-target mutagenesis in *rpoB* in these strains compared  
267 to the negative control (pSEVA221) (Fig. 4d). Lastly, we confirmed that the mutagenic activity  
268 of TadA\*-T7RNAP in URA3 was dependent on the presence of P<sub>T7</sub> promoter since its  
269 mutagenesis frequency dropped to the baseline levels in the strain MG\*-URA3 $\Delta$ *ung* $\Delta$ P<sub>T7</sub> (Fig.  
270 4e). Altogether these data demonstrate that TadA\*-T7RNAP fusion has a specific mutagenic  
271 activity for the target DNA having P<sub>T7</sub>. This mutagenic activity is independent of UNG, being  
272 moderately increased 2- to 5-fold when endonuclease V is absent.

273

274 *Characterization of the mutations produced by BD-T7RNAP fusions.* We randomly picked 30  
275 FOA<sup>R</sup> colonies (URA3 mutants) from the MG\*-URA3 $\Delta$ *ung* strains expressing native T7RNAP,  
276 AID-, pmCDA1- and rAPOBEC1- fusions to T7RNAP, and 30 additional FOA<sup>R</sup> colonies grown  
277 from MG\*-URA3 $\Delta$ *ung* $\Delta$ *nfi* strain expressing TadA\*-T7RNAP. The URA3 alleles from these  
278 colonies were amplified as PCR fragments including the 5' Ptac promoter, the complete URA3  
279 gene and downstream P<sub>T7</sub>, and their DNA sequence was determined. As an additional control,  
280 the URA3 alleles from 13 FOA-sensitive colonies from MG\*-URA3 $\Delta$ *ung* strain with plasmid  
281 pSEVA221 were amplified in parallel and sequenced, which did not show any mutation from the  
282 wild type sequence of URA3 allele. In contrast, in all FOA<sup>R</sup> colonies analyzed from strains  
283 expressing CD-T7RNAP fusions we found multiple transitions C:G to T:A in both DNA strands  
284 along the Ptac and URA3 gene, but not in the P<sub>T7</sub> sequence (Fig. 5a). In the case of FOA<sup>R</sup>  
285 colonies from MG\*-URA3 $\Delta$ *ung* $\Delta$ *nfi* strain with TadA\*-T7RNAP, all alleles contained transitions  
286 A:T to G:C in both DNA strands of the URA3 gene, except one different mutation, a C:G to T:A  
287 transition (Fig. 5b). No other type of DNA mutations, deletions, or insertions, were observed in  
288 any of the URA3 alleles of FOA<sup>R</sup> colonies analyzed expressing BD-T7RNAP fusions. This was

289 not the case in FOA<sup>R</sup> colonies derived from the expression of native T7RNAP, which contained  
290 URA3 alleles with more types of mutations, including transitions (A:T to G:C and C:G to T:A),  
291 transversions (A:T to C:G and A:T to T:A), deletions, and insertions (Supplementary Fig. 2).  
292 Showing correlation to the mutagenic capacity of the three CD-T7RNAP fusions, the highest  
293 total number of mutations was found with pmCDA1-T7RNAP (426) followed by rAPOBEC1-  
294 T7RNAP (95) and AID-T7RNAP (42) (Fig 5c). The total number of mutations found in the 30  
295 URA3 alleles from TadA\*-T7RNAP was 37, similar to that of AID-T7RNAP (Fig. 5c). The average  
296 number of mutations per clone presented the same hierarchy: pmCDA1-T7RNAP (14.2) >  
297 rAPOBEC1-T7RNAP (3.2) > AID-T7RNAP (1.4) > TadA\*-T7RNAP (1.2) (Fig. 5d). It is worth  
298 noting that for all CD-T7RNAP fusions, transitions G to A were detected more frequently than C  
299 to T in the URA3 coding strand (Figs. 5a and 5c). This indicates that CD-T7RNAP fusions  
300 mutates more frequently Cs in the non-coding strand of URA3, which corresponds to the non-  
301 template strand for the CD-T7RNAP fusions (Supplementary Fig. 3). This mutagenesis bias to  
302 the non-template strand is less pronounced for AID-T7RNAP (62%) than for rAPOBEC1-  
303 T7RNAP (74%) or pmCDA1-T7RNAP (91%) (Fig. 5c). In the case of TadA\*-T7RNAP, we also  
304 found a bias favoring T to C mutations in the coding strand of URA3 (84%), corresponding to A  
305 to G mutations in the non-template strand for the TadA\*-T7RNAP fusion (Fig. 5c and  
306 Supplementary Fig. 3). Therefore, DNA sequencing of URA3 mutant clones demonstrates that  
307 CD and AD fusions induce the expected mutations with a variable bias towards the non-template  
308 strand depending on the specific BD employed.

309

310 For a further analysis of the mutagenic process a 284 bp PCR fragment of the URA3 gene was  
311 amplified from a culture of MG\*-URA3 $\Delta$ ung expressing AID-T7RNAP and was subjected to  
312 massive next-generation sequencing (NGS; Materials and Methods). As a control, the same  
313 region was amplified from an induced culture of MG\*-URA3 $\Delta$ ung carrying the empty plasmid  
314 pSEVA221 and also subjected to NGS. The results of the variant call analysis from the two  
315 samples (ca. 1x10<sup>6</sup> reads/sample) were compared and only the transition C:G to T:A appeared  
316 in an statistically significant higher number of reads in bacteria expressing AID-T7RNAP  
317 (Supplementary Fig. 4). Using an identical experimental approach, we analyzed the mutations

318 caused in URA3 by TadA\*-T7RNAP in MG\*-URA3 $\Delta$ ung $\Delta$ nfi compared with a culture of the same  
319 strain carrying pSEVA221. In this case, only transitions A:T to G:C were detected in a statistically  
320 significant higher number of reads in the sample expressing TadA\*-T7RNAP (Supplementary  
321 Fig. 5). Hence, massive DNA sequencing data is consistent with the DNA sequencing results of  
322 individual URA3 mutants and confirms that the AID- and TadA\*-T7RNAP generates only their  
323 expected transitions.

324

325 *Protection from mutagenesis of downstream regions by blockade with dCas9.* The BD-T7RNAP  
326 fusions were able to transcribe the *gfp* gene downstream of URA3 and, presumably, creating  
327 mutations in this gene and beyond. To confirm this, we inserted in the GFP-URA3 cassette the  
328 *sacB* gene from *Bacillus subtilis* as an additional counter-selection system<sup>53</sup>. The gene *sacB*  
329 codes for exoenzyme levansucrase, which uses sucrose to produce levan that accumulates in  
330 the periplasm of *E. coli* killing the bacteria. A Ptac-*sacB* fusion was inserted downstream *gfp* in  
331 the GFP-URA3 cassette (Fig. 6a), and the new cassette was integrated in the *flu* locus of  
332 MG\* $\Delta$ pyrF $\Delta$ ung $\Delta$ nfi. The resulting strain, named MG\*-SacB-URA3 $\Delta$ ung $\Delta$ nfi, was sensitive to  
333 sucrose with a frequency of spontaneous mutants of ca.  $5 \times 10^{-6}$ . When AID-T7RNAP was  
334 expressed in this strain the mutagenesis frequency of *sacB* increased to  $\sim 6 \times 10^{-4}$   
335 (Supplementary Fig. 6). The mutagenesis frequency of URA3 in this strain with AID-T7RNAP  
336 ( $\sim 1.7 \times 10^{-3}$ ) was similar to that observed in MG\*-URA3 $\Delta$ ung $\Delta$ nfi (Fig. 4d). These results confirm  
337 that BD-T7RNAP fusions are able to mutate downstream regions to the target gene.

338

339 To delimit the mutagenesis of BD-T7RNAP fusions within the target gene, we investigated the  
340 possibility of blocking elongation of T7RNAP with dCas9. dCas9 can bind a target DNA  
341 sequence using a crRNA or gRNA and has been successfully used as transcriptional repressor  
342 for the endogenous *E. coli* RNAP<sup>54</sup>. Importantly, co-expression of two gRNAs targeting the  
343 same gene enhanced the transcription repression of *E. coli* RNAP by dCas9<sup>55</sup>. To study whether  
344 dCas9 can block elongation of BD-T7RNAP fusions we designed three crRNAs (Ta, Tb, Tc)  
345 against the non-template strand of *gfp* (Figs. 6a and 6b) and generate double (Tb.a) and triple  
346 (Tb.a.c) crRNAs. The plasmid pdCas9<sup>54</sup> was used for the constitutive expression of dCas9, the

347 transactivating CRISPR RNA (tracrRNA) and the designed crRNAs. The strain MG\*-SacB-  
348 URA3 $\Delta$ ung $\Delta$ nfi was transformed with plasmid pdCas9 (without crRNAs) and derivatives  
349 pdCas9-Tb.a and pdCas9-Tb.a.c. Then, these strains were transformed with the plasmid  
350 encoding AID-T7RNAP or the empty vector pSEVA221. After growth and aTc induction the  
351 levels of GFP expression were determined by flow cytometry (Fig. 6c). The expression of the  
352 double crRNAs Tb.a repressed GFP levels to ~30% and with the triple crRNAs Tb.a.c the levels  
353 of GFP were further repressed to ~20%. The basal level of GFP expression in strains carrying  
354 pSEVA221 was consider 0%. The protection of *sacB* from the BD-T7RNAP mutagenesis was  
355 assessed by the ratio of mutation frequencies in *sacB* vs. URA3 in each of these strains. This  
356 ratio was normalized as 1 for the strain expressing AID-T7RNAP and carrying pdCas9 without  
357 crRNAs (Fig. 6d). In concordance with the reduction of GFP expression detected by flow  
358 cytometry, the mutagenesis of *sacB* dropped ~10 to ~14-fold when the double (Tb.a) and triple  
359 (Tb.a.c) crRNAs were expressed, respectively (Fig. 6d). These results demonstrate that the  
360 dCas9 blockade can be used to limit the mutagenesis activity of BD-T7RNAP fusions mostly to  
361 a target gene (or gene segment), significantly reducing the mutagenesis of downstream DNA  
362 regions.

363

## 364 **Discussion**

365 In this work we have reported an *in vivo* mutagenesis system with high specificity for a target  
366 gene based on the tethering of different BDs (AID, rAPOBEC1, pmCDA1 and TadA\*) fused to  
367 T7RNAP, which selectively recognizes its specific promoter ( $P_{T7}$ ) in reverse orientation at the 3'-  
368 end and that transcribes throughout the target gene. Expression of the target gene is maintained  
369 from its endogenous 5'-end promoter. The use of different BDs confers flexibility to the system  
370 due to their different mutagenesis profile. Although the expression level and transcriptional  
371 activity of CD-T7RNAP fusions were shown to be similar, their mutagenic capacity varied greatly  
372 ranging from the least active fusion with AID (URA3 mutagenesis frequency of ca.  $10^{-3}$ ) to the  
373 most active fusion with pmCDA1 (URA3 mutagenesis frequency of ca.  $10^{-1}$ ). The fusion bearing  
374 rAPOBEC1 produced an intermediate URA3 mutagenesis frequency of ca.  $10^{-2}$ . This means  
375 that the mutagenesis frequency of a particular target gene can be modulated using different CD-

376 T7RNAP fusions. As expected, the mutations found in the target gene (URA3) by the CD-  
377 T7RNAP fusions were transitions C:G to T:A corresponding to the CD activity. In order to broad  
378 the mutation spectrum to A:T base pairs in the target gene, we also constructed the fusion  
379 TadA\*-T7RNAP using the modified adenosine deaminase TadA7.10 (TadA\*)<sup>28</sup>. This fusion was  
380 expressed at higher levels than the CD-T7RNAP fusions, and was proved to generate bp  
381 transitions A:T to G:C in the target gene (URA3) with a mutagenesis frequency of ca. 10<sup>-3</sup>, similar  
382 to that elicited by AID-T7RNAP fusion. The average number of mutations in URA3 (ca. 1 kb) per  
383 clone agreed with the frequency of FOA<sup>R</sup> mutants produced by the expression of the different  
384 fusions, being the fusion with pmCDA1 the enzyme introducing the highest number of mutations  
385 (ca. 14) whereas AID and TadA\* fusions introduced the lowest number of mutations per clone  
386 (ca. 1.2 - 1.4). A single mutant isolated from TadA\*-T7RNAP expression contained an  
387 unexpected bp transition (C:G to T:A), which could be caused by a non-specific base deaminase  
388 activity of TadA\* or by the use of a common *E. coli*  $\Delta ung$  host strain for expression of all BD-  
389 T7RNAP in these experiments. Nevertheless, massive DNA sequencing of a short amplicon of  
390 URA3, obtained after induction of AID and TadA\* fusions without selection process, detected  
391 only the expected bp transitions C:G to T:A for AID and A:T to G:C for TadA\*. Importantly, no  
392 other type of mutations (e.g. deletions, insertions) were found among the mutants isolated after  
393 expression of any of the BD-T7RNAP fusions. This result contrasts with the various types of  
394 mutations found after expression of T7RNAP alone. Our data revealed that transcription caused  
395 by T7RNAP alone increases the mutation frequency of the target gene by a mechanism that is  
396 independent of BDs, but that might be related to high exposure of ssDNA in the target gene  
397 and/or with conflicts of transcription with other cellular machineries (e.g. DNA polymerases  
398 during replication)<sup>56</sup>.

399

400 Elimination of the DNA repair enzymes UNG and endonuclease V (*nfi*) was important to obtain  
401 optimal mutagenesis frequencies. It is well-known that UNG has a key role in reverting the  
402 mutations caused by CDs, so this enzymatic activity was inhibited in other mutagenesis systems  
403 based on CDs<sup>18, 19</sup>. In our case, when UNG was present the mutagenesis frequency dropped  
404 between 500-fold for AID and 3000-fold for pmCDA1 and rAPOBEC. We deleted *ung* in our host



405 strains to ensure complete abrogation of UNG activity, but an interesting alternative to *ung*  
406 deletion is its transient inhibition by expression of UGI (uracil N-glycosylase inhibitor) from  
407 bacteriophage PBS2<sup>25</sup>. For the mutagenesis with TadA\*-T7RNAP, the effect of the  
408 endonuclease V was very mild. Only a decrease of 2- to 5-fold in the mutagenesis frequency  
409 with TadA\*-T7RNAP was detected in bacteria with endonuclease V. Therefore, it seems that  
410 the removal of inosines generated by TadA\* was much less efficient than removal of uracils  
411 generated by CDs in the genomic DNA of *E. coli*. This was also observed in eukaryotic cells  
412 subjected to mutagenesis with TadA\*<sup>28</sup>. It is worth to mention that UNG did not affect the TadA\*-  
413 T7RNAP mutagenesis nor did endonuclease V affect the mutagenesis of AID-T7RNAP fusion.  
414  
415 Another observation to be noted is that the mutagenic capacity of the BD-T7RNAP fusions  
416 presented a bias towards the non-template strand. This phenomenon is less pronounced for  
417 AID-T7RNAP but it is detected with all of them. The reason of this strand preference is unclear  
418 but it may be caused by a better exposure of the cytosines or adenines on this strand in the  
419 transcription bubble. The template strand could be less accessible due its insertion in the catalytic  
420 core of the T7RNAP and the formation of the ssDNA:RNA hybrid<sup>57</sup>.  
421  
422 A key property of a targeted mutagenesis system is the specificity towards the on-target  
423 sequence, keeping as low as possible the “off-target” mutagenesis to avoid the generation of  
424 deleterious mutations in other parts of the genome. The specificity of the system was assessed by  
425 two different approaches: monitoring mutations in the *rpoB* gene that conferred rifampicin  
426 resistance and monitoring mutations in the URA3 gene in absence of the T7 promoter. We found  
427 very high on-target vs. off-target ratios for all BD-T7RNAP fusions (ca.  $\geq 10^3$ ). Nevertheless,  
428 some off-target mutagenesis is observed by the expression of these fusions. Compared to  
429 mutations frequencies found in a host strain (e.g.  $\Delta ung$ ) without BD-T7RNAP fusion, the “off-  
430 target” mutagenesis increased moderately (ca. 2 to 5- fold) for AID- and TadA\*-fusions and more  
431 noticeable (ca. 10 to 20-fold) for pmCDA1- and rAPOBEC-fusions.  
432



433 A different situation is caused by “off-target” mutations in downstream sequences (in relation to  
434 the T7 promoter) of the target gene due to the high processivity of the BD-T7RNAP fusions. To  
435 restrict the mutagenesis of BD-T7RNAP fusions to the target gene, we used dCas9 directed with  
436 crRNAs to block transcriptional elongation. This strategy has been previously used to repress  
437 gene expression in *E. coli* by blocking the endogenous RNA polymerase<sup>54, 55</sup>. It has been  
438 reported that dCas9 blocks the *E. coli* RNAP when the crRNAs bind to the non-template strand  
439 and the presence of two targeting crRNAs enhance the repression<sup>55</sup>. Keeping this in mind, we  
440 designed three crRNAs targeting the non-template strand. We have shown that the 3  
441 crRNAs/dCas9 complexes are able to inhibit elongation of BD-T7RNAP fusions and reduce ca.  
442 14-fold the mutagenesis of adjacent downstream DNA (with respect to T7RNAP elongation).  
443 Therefore, the protection from mutagenesis of downstream regions was significant, yet it may be  
444 improved with dCas9 variants having increased blockade activity<sup>58</sup>.

445

446 One interesting feature of the reported method is that it could be adapted for its use in different  
447 hosts since BDs, T7RNAP and dCas9 have been expressed in different bacteria, yeast and  
448 mammalian cells<sup>18, 19, 21, 30, 31, 32</sup>. For modulation of the DNA repair systems, the expression of  
449 UGI would avoid the need of delete *ung* in host that are not *E. coli*. Elimination of *nfi* is not  
450 essential because the mutagenesis with TadA\*-T7RNAP is still significant in the presence of the  
451 endonuclease V. However, the modified TadA\* pairs with the endogenous TadA of *E. coli* to  
452 render a full active enzyme<sup>28</sup>. Hence, for mutagenesis in hosts that lacks endogenous TadA, a  
453 heterodimeric construct fusing TadA and TadA\* is needed<sup>28</sup>. In mammalian cells incorporation  
454 of a nuclear localization signal (NLS) may be also necessary for targeting these protein fusions  
455 to the cell nucleus.

456

457 The system described in this work can be used for molecular evolution of different genes and  
458 operons of interest by simply replacing URA3 by these new target sequences. Alternatively the  
459 T7 promoter can be integrated downstream of genes or operons in the genome of *E. coli* or  
460 other cell host. The integration of multiple T7 promoters in different parts of the genome (e.g.,  
461 downstream of genes involved in a metabolic pathway or in antibiotic resistance) would render

462 in a multiplex genome editing for directed evolution of a cell phenotype. Alternatively, a plasmid  
463 that carries the target gene/s and the T7 promoter can be used. A recent independent study  
464 reported that a fusion between rAPOBEC1 and T7RNAP was able to generate mutations in  
465 antibiotic resistance genes located in plasmids carrying the T7 promoter<sup>59</sup>. The use of multicopy  
466 plasmids can ease the initial utilization of the system but it has the drawback that creates multiple  
467 variants of the target gene/s in one cell. For selection of a particular variant, plasmid isolation  
468 and re-transformation of cells would be needed. When the genetic determinants are integrated  
469 in single copy in the genome, the mutagenesis and selection of the variants with the desired  
470 properties can be done in sequential iterative cycles without extensive manipulation of the  
471 culture as a continuous evolution process. We have demonstrate that different BDs-T7RNAP  
472 fusions can be used for the mutagenesis, and in particular that AID has lower off-target activity  
473 and mutagenic bias to the non-template strand than rAPOBEC1. Finally, our study also  
474 demonstrates that dCas9 with crRNAs can be used to limit the mutagenic activity within a target  
475 gene or gene segment without the introduction of multiple transcriptional terminators<sup>59</sup>.

476

477 In sum, the BD-T7RNAP-based method hereby documented poses a simple workflow that could  
478 be applied for continuous molecular evolution of genes or operons with minimum manipulation.  
479 The extension of the mutagenized DNA can be delimited with dCas9 directed with designed  
480 crRNAs. Hence, *in vivo* mutagenesis with BD-T7RNAP fusions has the potential to be applied  
481 for the molecular evolution of biotechnologically relevant proteins, metabolic engineering of  
482 enzymatic pathways, diversification of gene libraries and other applications such as the study of  
483 the potential evolution pathways of antibiotic resistance genes.

484

## 485 **Methods**

486 **Bacterial strains, media and growth conditions.** A full list of the bacterial strains used in this  
487 study can be found in Supplementary Table 1. For plasmid propagation and cloning the *E. coli*  
488 strains used were DH10BT1R<sup>60</sup> and BW25141 (for the *pir*-dependent suicide plasmid  
489 derivatives)<sup>61</sup>. All the strains were grown in Lysogeny Broth (LB) at 37 °C and shaking at 250  
490 rpm<sup>62</sup>. For solid medium, 1.5 % (w/v) agar was added to LB. The following antibiotics were

491 added to the medium when needed: 50 µg/ml kanamycin (Km), 30 µg/ml chloramphenicol (Cm),  
492 50 µg/ml apramycin (Apra) and 50 µg/ml rifampicin (Rif). Antibiotics were obtained from  
493 Duchefa-Biochemie. All other chemical reagents were obtained from Merck-Sigma unless  
494 indicated otherwise. For monitoring the mutagenic process, minimal medium M9 plates were  
495 used <sup>62</sup>. This medium contains: 1x M9 salts (1 g/l NH<sub>4</sub>Cl, 3 g/l KH<sub>2</sub>PO<sub>4</sub> and 6 g/l Na<sub>2</sub>HPO<sub>4</sub>), 2  
496 mM MgSO<sub>4</sub>, 0.4 % (w/v) glucose, 0.0005 % (w/v) thiamine and 1.6 % (w/v) agar for solidification.  
497 When required, the minimal medium was supplemented with 20 µg/ml uracil and 250 µg/ml 5-  
498 fluorororic acid (FOA) (Zymo Research) or 60 g/l sucrose (counter-selection with *sacB*).

499

500 **Plasmids and cloning procedures.** A list of the plasmids used in this study can be found in  
501 the Supplementary Table 2. The plasmids pGE*pyrF*, pGE*ung* and pGE*nif* derived from *pir*-  
502 dependent plasmid pGE (Km<sup>R</sup>, R6K origin of replication) were constructed to delete the genes  
503 *pyrF*, *ung* and *nif*, respectively. Thermosensitive plasmids derivatives of pGETS (Km<sup>r</sup>, pSC101-  
504 ts origins of replication) were used to integrate the mutagenesis reporter cassettes in the non-  
505 essential locus of *flu*. The homology regions of the genes *pyrF*, *ung*, *nif* and *flu* were amplified  
506 by PCR using as template genomic DNA from *E. coli* MG1655. The gene *gfp*<sup>TCD</sup> <sup>63</sup> coding for  
507 GFP was obtained from the plasmid pGEyeeJPtac-gfp <sup>38</sup>, the URA3 gene was a synthetic  
508 version optimized for *E. coli* (GeneCust), and the *sacB* gene was amplified from genomic DNA  
509 from *E. coli* T-SACK <sup>64</sup>. The plasmid pSEVA221 (Km<sup>r</sup>, RK2-origin) <sup>65</sup> was used for expression of  
510 the T7RNAP fusions under the control of the *tetR*-P<sub>tetA</sub> promoter <sup>46</sup>. The *tetR*-P<sub>tetA</sub> and the DNA  
511 fragments coding for the base deaminase (BD) enzymes fused to the linker peptide (G<sub>3</sub>S)<sub>7</sub> were  
512 chemically synthesized with codon optimization for expression in *E. coli* (GeneART,  
513 ThermoFisher Scientific). The following BD enzymes were synthesized: human AID (Activation-  
514 induced cytidine deaminase), rAPOBEC1 (rat apolipoprotein B mRNA editing enzyme) <sup>66</sup> ,  
515 pmCDA1 (lamprey cytidine deaminase 1) <sup>67</sup>, and TadA\* (*E. coli* adenine deaminase variant  
516 TadA7.10) <sup>28</sup>. The proofreading DNA polymerase Herculase II Fusion (Agilent Technologies)  
517 was used to amplify DNA fragments for cloning purposes. The plasmid pdCas9 <sup>54</sup> was used for

518 the constitutively expression of the catalytically “dead” Cas9 (dCas9), the trans-activating crRNA  
519 RNA (tracrRNA) and the CRISPR RNAs (crRNA). The double (Tb.a) and triple (Tb.a.c) spacer  
520 arrays were cloned into the *Bsa*I site of pdCas9 using hybridized complimentary  
521 oligonucleotides, and following the one-step scheme CRATES<sup>68</sup> (Supplementary Methods).  
522 Cloning procedures were performed following standard protocols of DNA digestion with  
523 restriction enzymes and ligation<sup>62</sup>. All DNA constructs were sequenced by the chain-termination  
524 Sanger method (Macrogen) and the sequences are deposited in GenBank (Supplementary  
525 Table 2).

526

527 **Generation of the reporter strains.** The reporter strains for the mutagenesis system were  
528 derived from the reference of *E. coli* K-12 strain MG1655<sup>39</sup>. The strain MG1655\* with higher  
529 sensitivity to FOA was generated by an oligo-mediated allelic replacement method<sup>16</sup>  
530 (Supplementary Methods). All the successive modifications were done over the MG1655\*  
531 genetic background. The genes *pyrF*, *ung* and *nfi* were deleted using the plasmids pGE*pyrF*,  
532 pGE*ung* and pGE*nfi*, respectively, by a marker-less genome edition strategy<sup>37</sup>. This strategy is  
533 based homologous recombination and resolution of the cointegrant promoted by the expression  
534 of the restriction enzyme I-SceI and the  $\lambda$ Red from the plasmid pACBSR<sup>69</sup>. The URA3 cassettes  
535 were inserted in the *flu* locus using plasmid derivatives of pGETS, as reported previously<sup>38</sup>.

536

537 **Induction of the mutagenesis system.** A colony of freshly transformed reporter strain with the  
538 indicated plasmid derivative of pSEVA221, was grown overnight (O/N) in LB with Km at 37 °C  
539 with shaking (250 rpm). The next day, the culture was diluted 1:100 in fresh media and incubated  
540 under the same conditions for 2 h. Then anhydrotetracycline (aTc, 200 ng/ml) (TOKU-E) was  
541 added for induction and the cultures were incubated for 1 h. After that, a 500  $\mu$ l-aliquot of each  
542 culture was washed with 1X phosphate-buffered saline (PBS) and resuspended in the same  
543 volume of PBS. A series of ten-fold dilutions of the cell suspension was prepared, and aliquots

544 of 100  $\mu$ l were plated in duplicates on different media: M9 + uracil; M9 + uracil and FOA; M9 +  
545 uracil and sucrose; and LB + Rif (see above for media composition).

546

547 **Flow cytometry analysis.** Levels of expression of *gfp* from induced cultures were determined  
548 by flow cytometry analysis as follows: the volume corresponding to one unit of optical density  
549 (O.D.) at 600 nm of the induced cultures was collected by centrifugation (3300xg, 5 min) and  
550 resuspended in 500  $\mu$ l 1X PBS. The cell suspension was diluted transferring 200  $\mu$ l to a tube  
551 with 1200  $\mu$ l of 1X PBS, and its fluorescence levels was determined using a Gallios FC500 flow  
552 cytometer (Beckman Coulter).

553

554 **Western blot analysis.** To detect the expression of the fusion proteins in cell extracts of induced  
555 cultures, Western blot analysis was performed. From induced cultures, 0.5 O.D. was collected  
556 by centrifugation 3300 g 5 min, washed once with 500  $\mu$ l 1X PBS, resuspended in 60  $\mu$ l of PBS  
557 and mixed with 15  $\mu$ l of 5X SDS-PAGE sample buffer<sup>70</sup>. The samples were boiled 10 min before  
558 loaded into 8% polyacrylamide SDS gels, and electrophoresis was done using the Miniprotean  
559 III system (Bio-Rad) during 1 h 30 min at 170 V. The gels were then transferred to a  
560 polyvinylidene difluoride membrane (PVDF, Immobilon-P, Millipore) by means of O/N wet  
561 transfer (Bio-Rad) 4 °C at 30 V. The membranes were blocked with PBS 0.1% (v/v) Tween 20  
562 with 3 % (w/v) skim milk powder and successively incubated with monoclonal mouse anti-T7  
563 RNA polymerase antibodies (Novagen, Merck) and POD labelled goat anti-mouse antibodies  
564 (Sigma). Membranes were developed by chemiluminescence using the Clarity Western ECL  
565 Substrate kit (Bio-Rad) and images were acquired using a ChemiDoc Touch system (Bio-Rad).

566

567 **DNA sequencing and analysis.** To determine the DNA sequence of the URA3 alleles in the  
568 FOA resistant colonies, a DNA fragment of 1191 bp was amplified using the pair of primers  
569 F\_GFPseq / R\_T0ter (Supplementary Table S6) with the GoTaq Flexi DNA polymerase  
570 (Promega) by colony PCR following manufacturer's instructions. The resulting amplicon was

571 sequenced by the Sanger chain-termination method (Macrogen) using the same primers. The  
572 resulting 2 reads per colony were mapped against the Ptac-URA3-P<sub>T7</sub> reference sequence (942  
573 bp) to detect variants using the program SeqMan Pro (DNASTar).

574

575 For deeper analysis of the variations in URA3, NGS sequencing analysis of a 200 bp region was  
576 performed. To do this, genomic DNA was extracted from ~4.5 ml of each induced culture (~5 x  
577 10<sup>9</sup> bacteria) using the GNOME DNA Kit (MP Biomedicals). One hundred ng of total genomic  
578 DNA was used as template in a PCR reaction to amplify 284 bp of URA3 with the pair of primers  
579 F\_CS1\_URA3 / R\_CS2\_URA3 that includes Illumina tags CS1 and CS2 (Supplementary Table  
580 S6). The DNA amplification was carried out in 50 µl reactions using Herculase II Fusion DNA  
581 polymerase (Agilent Technologies) following manufacturer's instructions. The amplicons were  
582 sent to the Genomic Unit of the Madrid Scientific Park to be sequenced by the NGS platform  
583 Illumina Miseq with paired-end (length > 2 x 300 bp) to acquire ~1,000,000 reads per sample.  
584 These reads were processed with the program Bbmap (Bushnell et al., 2017, PMID: 29073143)  
585 for merging the paired-end reads. The resulting merged files were pile up against the reference  
586 sequence using the program Samtools (Li et al., 2009, PMID: 19505943), and the variants were  
587 obtained with the program VarScan (Koboldt et al., 2012, PMID: 22300766) with the following  
588 parameters: --min-coverage 1 --min-reads2 1 --min-avg-qual 40 --min-var-freq 0.000001 --p-  
589 value 0.99. The sequences of the oligonucleotides used for amplification were discarded from  
590 the analysis since they may contain variations due to chemical synthesis.

591

592 **Statistics.** Means and standard errors of experimental values were calculated using Prism 5.0  
593 (GraphPad software Inc). Statistical analyses comparing groups in pairs were performed using  
594 Mann Whitney test (Fig. 3d, Supplementary Figs. S4 and S5) and two-tailed Student's t-test  
595 (Figs. 4d and 4e, Fig. 6d) from at least three independent experiments. A value of p<0.05 was  
596 considered significant.

597

## 598 **Data availability.**

599 Data that support the findings of this work can be found in the main manuscript and in the  
600 Supplementary information. Materials and additional data are available from the corresponding  
601 author upon request. The sequences of the constructs built for this study are deposited in  
602 GenBank with the accession numbers listed in Supplementary Table 2.

603  
604

## 605 **References**

606

- 607 1. Tobin PH, Richards DH, Callender RA, Wilson CJ. Protein engineering: a new frontier  
608 for biological therapeutics. *Curr Drug Metab* **15**, 743-756 (2014).  
609
- 610 2. Porter JL, Rusli RA, Ollis DL. Directed Evolution of Enzymes for Industrial Biocatalysis.  
611 *Chembiochem* **17**, 197-203 (2016).  
612
- 613 3. Davis AM, Plowright AT, Valeur E. Directing evolution: the next revolution in drug  
614 discovery? *Nature Reviews Drug Discovery* **16**, 681 (2017).  
615
- 616 4. Packer MS, Liu DR. Methods for the directed evolution of proteins. *Nature reviews*  
617 *Genetics* **16**, 379-394 (2015).  
618
- 619 5. Simon AJ, d'Oelsnitz S, Ellington AD. Synthetic evolution. *Nature Biotechnology* **37**,  
620 730-743 (2019).  
621
- 622 6. Jijakli K, *et al.* The in vitro selection world. *Methods* **106**, 3-13 (2016).  
623
- 624 7. Esvelt KM, Carlson JC, Liu DR. A system for the continuous directed evolution of  
625 biomolecules. *Nature* **472**, 499-503 (2011).  
626
- 627 8. Foster PL. In Vivo Mutagenesis. *Methods in enzymology* **204**, 114-125 (1991).  
628
- 629 9. Badran AH, Liu DR. Development of potent in vivo mutagenesis plasmids with broad  
630 mutational spectra. *Nat Commun* **6**, 8425 (2015).  
631
- 632 10. Muteeb G, Sen R. Random mutagenesis using a mutator strain. *Methods Mol Biol* **634**,  
633 411-419 (2010).  
634
- 635 11. Nguyen AW, Daugherty PS. Production of randomly mutated plasmid libraries using  
636 mutator strains. *Methods Mol Biol* **231**, 39-44 (2003).  
637
- 638 12. Irving RA, Kortt AA, Hudson PJ. Affinity maturation of recombinant antibodies using *E.*  
639 *coli* mutator cells. *Immunotechnology* **2**, 127-143 (1996).  
640
- 641 13. Camps M, Naukkarinen J, Johnson BP, Loeb LA. Targeted gene evolution in  
642 *Escherichia coli* using a highly error-prone DNA polymerase I. *Proceedings of the*  
643 *National Academy of Sciences* **100**, 9727-9732 (2003).  
644
- 645 14. Wang HH, *et al.* Programming cells by multiplex genome engineering and accelerated  
646 evolution. *Nature* **460**, 894-898 (2009).



- 647  
648 15. Bonde MT, *et al.* Direct mutagenesis of thousands of genomic targets using  
649 microarray-derived oligonucleotides. *ACS synthetic biology* **4**, 17-22 (2015).  
650  
651 16. Nyerges A, *et al.* A highly precise and portable genome engineering method allows  
652 comparison of mutational effects across bacterial species. *Proc Natl Acad Sci U S A*  
653 **113**, 2502-2507 (2016).  
654  
655 17. Crook N, Abatemarco J, Sun J, Wagner JM, Schmitz A, Alper HS. In vivo continuous  
656 evolution of genes and pathways in yeast. *Nat Commun* **7**, 13051 (2016).  
657  
658 18. Komor AC, Kim YB, Packer MS, Zuris JA, Liu DR. Programmable editing of a target  
659 base in genomic DNA without double-stranded DNA cleavage. *Nature* **533**, 420-424  
660 (2016).  
661  
662 19. Nishida K, *et al.* Targeted nucleotide editing using hybrid prokaryotic and vertebrate  
663 adaptive immune systems. *Science* **353**, (2016).  
664  
665 20. Hess GT, *et al.* Directed evolution using dCas9-targeted somatic hypermutation in  
666 mammalian cells. *Nat Methods* **13**, 1036-1042 (2016).  
667  
668 21. Li X, *et al.* Base editing with a Cpf1-cytidine deaminase fusion. *Nat Biotechnol* **36**, 324-  
669 327 (2018).  
670  
671 22. Lada AG, *et al.* Mutator effects and mutation signatures of editing deaminases  
672 produced in bacteria and yeast. *Biochemistry (Mosc)* **76**, 131-146 (2011).  
673  
674 23. Poltoratsky VP, Wilson SH, Kunkel TA, Pavlov YI. Recombinogenic phenotype of  
675 human activation-induced cytosine deaminase. *J Immunol* **172**, 4308-4313 (2004).  
676  
677 24. Petersen-Mahrt SK, Harris RS, Neuberger MS. AID mutates *E. coli* suggesting a DNA  
678 deamination mechanism for antibody diversification. *Nature* **418**, 99-103 (2002).  
679  
680 25. Wang ZG, Smith DG, Mosbaugh DW. Overproduction and characterization of the  
681 uracil-DNA glycosylase inhibitor of bacteriophage PBS2. *Gene* **99**, 31-37 (1991).  
682  
683 26. Schormann N, Ricciardi R, Chattopadhyay D. Uracil-DNA glycosylases-Structural and  
684 functional perspectives on an essential family of DNA repair enzymes. *Protein Science*  
685 **23**, 1667-1685 (2014).  
686  
687 27. Krokan HE, Bjoras M. Base excision repair. *Cold Spring Harbor perspectives in biology*  
688 **5**, a012583 (2013).  
689  
690 28. Gaudelli NM, *et al.* Programmable base editing of A•T to G•C in genomic DNA without  
691 DNA cleavage. *Nature* **551**, 464 (2017).  
692  
693 29. Halperin SO, Tou CJ, Wong EB, Modavi C, Schaffer DV, Dueber JE. CRISPR-guided  
694 DNA polymerases enable diversification of all nucleotides in a tunable window. *Nature*  
695 **560**, 248-252 (2018).  
696  
697 30. Bolukbasi MF, Gupta A, Wolfe SA. Creating and evaluating accurate CRISPR-Cas9  
698 scalpels for genomic surgery. *Nat Meth* **13**, 41-50 (2016).  
699  
700 31. Dower K, Rosbash M. T7 RNA polymerase-directed transcripts are processed in yeast  
701 and link 3' end formation to mRNA nuclear export. *RNA* **8**, 686-697 (2002).

- 702  
703 32. Lieber A, Sandig V, Strauss M. A mutant T7 phage promoter is specifically transcribed  
704 by T7-RNA polymerase in mammalian cells. *Eur J Biochem* **217**, 387-394 (1993).  
705  
706 33. Jones ME. Orotidylate decarboxylase of yeast and man. *Curr Top Cell Regul* **33**, 331-  
707 342 (1992).  
708  
709 34. Boeke JD, LaCroute F, Fink GR. A positive selection for mutants lacking orotidine-5'-  
710 phosphate decarboxylase activity in yeast: 5-fluoro-orotic acid resistance. *Mol Gen*  
711 *Genet* **197**, 345-346 (1984).  
712  
713 35. Meng X, Smith RM, Giesecke AV, Joung JK, Wolfe SA. Counter-selectable marker for  
714 bacterial-based interaction trap systems. *Biotechniques* **40**, 179-184 (2006).  
715  
716 36. van der Woude MW, Henderson IR. Regulation and function of Ag43 (flu). *Annu Rev*  
717 *Microbiol* **62**, 153-169 (2008).  
718  
719 37. Piñero-Lambea C, Bodelón G, Fernández-Periáñez R, Cuesta AM, Álvarez-Vallina L,  
720 Fernández LA. Programming Controlled Adhesion of *E. coli* to Target Surfaces, Cells,  
721 and Tumors with Synthetic Adhesins. *ACS synthetic biology* **4**, 463-473 (2015).  
722  
723 38. Ruano-Gallego D, Álvarez B, Fernández LÁ. Engineering the Controlled Assembly of  
724 Filamentous Injectisomes in *E. coli* K-12 for Protein Translocation into Mammalian  
725 Cells. *ACS synthetic biology* **4**, 1030-1041 (2015).  
726  
727 39. Blattner FR, *et al.* The complete genome sequence of *Escherichia coli* K-12. *Science*  
728 **277**, 1453-1462 (1997).  
729  
730 40. Hayashi K, *et al.* Highly accurate genome sequences of *Escherichia coli* K-12 strains  
731 MG1655 and W3110. *Mol Syst Biol* **2**, 2006 0007 (2006).  
732  
733 41. Jensen KF. The *Escherichia coli* K-12 "wild types" W3110 and MG1655 have an rph  
734 frameshift mutation that leads to pyrimidine starvation due to low pyrE expression  
735 levels. *Journal of Bacteriology* **175**, 3401-3407 (1993).  
736  
737 42. Salema V, Fernández LÁ. High yield purification of nanobodies from the periplasm of  
738 *E. coli* as fusions with the maltose binding protein. *Protein Expression and Purification*  
739 **91**, 42-48 (2013).  
740  
741 43. Jurado P, de Lorenzo V, Fernández LA. Thioredoxin Fusions Increase Folding of  
742 Single Chain Fv Antibodies in the Cytoplasm of *Escherichia coli*: Evidence that  
743 Chaperone Activity is the Prime Effect of Thioredoxin. *J Mol Biol* **357**, 49-61 (2006).  
744  
745 44. Kern R, Malki A, Holmgren A, Richarme G. Chaperone properties of *Escherichia coli*  
746 thioredoxin and thioredoxin reductase. *Biochem J* **371**, 965-972 (2003).  
747  
748 45. Bach H, *et al.* *Escherichia coli* Maltose-binding Protein as a Molecular Chaperone for  
749 Recombinant Intracellular Cytoplasmic Single-chain Antibodies. *J Mol Biol* **312**, 79-93.  
750 (2001).  
751  
752 46. Bertram R, Hillen W. The application of Tet repressor in prokaryotic gene regulation  
753 and expression. *Microbial Biotechnology* **1**, 2-16 (2008).  
754

- 755 47. Berens C, Hillen W. Gene regulation by tetracyclines. Constraints of resistance  
756 regulation in bacteria shape TetR for application in eukaryotes. *European Journal of*  
757 *Biochemistry* **270**, 3109-3121 (2003).  
758
- 759 48. Silva-Rocha R, *et al.* The Standard European Vector Architecture (SEVA): a coherent  
760 platform for the analysis and deployment of complex prokaryotic phenotypes. *Nucleic*  
761 *Acids Res* **41**, D666-675 (2013).  
762
- 763 49. Ovchinnikov YA, *et al.* RNA polymerase rifampicin resistance mutations in *Escherichia*  
764 *coli*: Sequence changes and dominance. *Molecular and General Genetics MGG* **190**,  
765 344-348 (1983).  
766
- 767 50. Severinov K, Soushko M, Goldfarb A, Nikiforov V. RifR mutations in the beginning of  
768 the *Escherichia coli* rpoB gene. *Molecular and General Genetics MGG* **244**, 120-126  
769 (1994).  
770
- 771 51. Vik ES, *et al.* Endonuclease V cleaves at inosines in RNA. *Nat Commun* **4**, 2271  
772 (2013).  
773
- 774 52. Guo G, Ding Y, Weiss B. nfi, the gene for endonuclease V in *Escherichia coli* K-12. *J*  
775 *Bacteriol* **179**, 310-316 (1997).  
776
- 777 53. Gay P, Le Coq D, Steinmetz M, Berkelman T, Kado CI. Positive selection procedure for  
778 entrapment of insertion sequence elements in gram-negative bacteria. *J Bacteriol* **164**,  
779 918-921 (1985).  
780
- 781 54. Bikard D, Jiang W, Samai P, Hochschild A, Zhang F, Marraffini LA. Programmable  
782 repression and activation of bacterial gene expression using an engineered CRISPR-  
783 Cas system. *Nucleic Acids Res* **41**, 7429-7437 (2013).  
784
- 785 55. Qi Lei S, *et al.* Repurposing CRISPR as an RNA-Guided Platform for Sequence-  
786 Specific Control of Gene Expression. *Cell* **152**, 1173-1183 (2013).  
787
- 788 56. Jinks-Robertson S, Bhagwat AS. Transcription-Associated Mutagenesis. *Annual*  
789 *Review of Genetics* **48**, 341-359 (2014).  
790
- 791 57. Durniak KJ, Bailey S, Steitz TA. The structure of a transcribing T7 RNA polymerase in  
792 transition from initiation to elongation. *Science* **322**, 553-557 (2008).  
793
- 794 58. Cebrian-Serrano A, Davies B. CRISPR-Cas orthologues and variants: optimizing the  
795 repertoire, specificity and delivery of genome engineering tools. *Mamm Genome* **28**,  
796 247-261 (2017).  
797
- 798 59. Moore CL, Papa LJ, 3rd, Shoulders MD. A Processive Protein Chimera Introduces  
799 Mutations across Defined DNA Regions In Vivo. *J Am Chem Soc*, (2018).  
800
- 801 60. Durfee T, *et al.* The complete genome sequence of *Escherichia coli* DH10B: insights  
802 into the biology of a laboratory workhorse. *J Bacteriol* **190**, 2597-2606 (2008).  
803
- 804 61. Datsenko KA, Wanner BL. One-step inactivation of chromosomal genes in *Escherichia*  
805 *coli* K-12 using PCR products. *Proc Natl Acad Sci U S A* **97**, 6640-6645. (2000).  
806
- 807 62. Sambrook J, Russel DW. *Molecular cloning. A laboratory manual*, 3rd edn. Cold Spring  
808 Harbor Laboratory Press (2001).  
809

- 810 63. Corcoran CP, Cameron AD, Dorman CJ. H-NS silences *gfp*, the green fluorescent  
811 protein gene: *gfpTCD* is a genetically Remastered *gfp* gene with reduced susceptibility  
812 to H-NS-mediated transcription silencing and with enhanced translation. *J Bacteriol*  
813 **192**, 4790-4793 (2010).  
814
- 815 64. Li X-t, Thomason LC, Sawitzke JA, Costantino N, Court DL. Positive and negative  
816 selection using the *tetA-sacB* cassette: recombineering and P1 transduction in  
817 *Escherichia coli*. *Nucleic Acids Research* **41**, e204 (2013).  
818
- 819 65. Martinez-Garcia E, Aparicio T, Goni-Moreno A, Fraile S, de Lorenzo V. SEVA 2.0: an  
820 update of the Standard European Vector Architecture for de-/re-construction of  
821 bacterial functionalities. *Nucleic Acids Res* **43**, D1183-1189 (2015).  
822
- 823 66. Conticello SG. The AID/APOBEC family of nucleic acid mutators. *Genome Biol* **9**, 229  
824 (2008).  
825
- 826 67. Rogozin IB, *et al.* Evolution and diversification of lamprey antigen receptors: evidence  
827 for involvement of an AID-APOBEC family cytosine deaminase. *Nat Immunol* **8**, 647-  
828 656 (2007).  
829
- 830 68. Liao C, *et al.* Modular one-pot assembly of CRISPR arrays enables library generation  
831 and reveals factors influencing crRNA biogenesis. *Nature Communications* **10**, 2948  
832 (2019).  
833
- 834 69. Herring CD, Glasner JD, Blattner FR. Gene replacement without selection: regulated  
835 suppression of amber mutations in *Escherichia coli*. *Gene* **311**, 153-163 (2003).  
836
- 837 70. Jurado P, Ritz D, Beckwith J, de Lorenzo V, Fernández LA. Production of functional  
838 single-chain Fv antibodies in the cytoplasm of *Escherichia coli*. *J Mol Biol* **320**, 1-10.  
839 (2002).  
840  
841  
842  
843  
844

## 845 Acknowledgements

846

847 We thank Dr. David Bickard (Institute Pasteur, France) and Drs. Esteban Martínez, Yamal Al-  
848 ramahi, and Tomás Aparicio (CNB-CSIC) for providing some materials used in this work. The  
849 excellent technical work in massive DNA sequencing of the Genomic Unit of "*Parque Científico*  
850 *de Madrid*" is greatly appreciated. We are grateful to Dr. Alejandra Bernardini (Hospital 12 de  
851 Octubre Madrid, Spain) for assistance with massive DNA sequencing data analysis. This work  
852 is supported by the Grants BIO2017-89081-R (Agencia Española de Investigación  
853 AEI/MICIU/FEDER, EU) to LAF and ERC-2012-ADG\_20120314 (European Research  
854 Council,EU) to VdL.

855

856 **Author contributions**

857

858 LAF, MM and VdL conceived the study. BA and LAF designed the experiments and analysed  
859 the results. BA performed the experiments. All authors interpreted the data. BA and LAF wrote  
860 the initial manuscript and prepared figures. All the authors revised and approved the final  
861 manuscript.

862

863 **Competing interests**

864 The authors declare that they have no competing interests

865

866

867

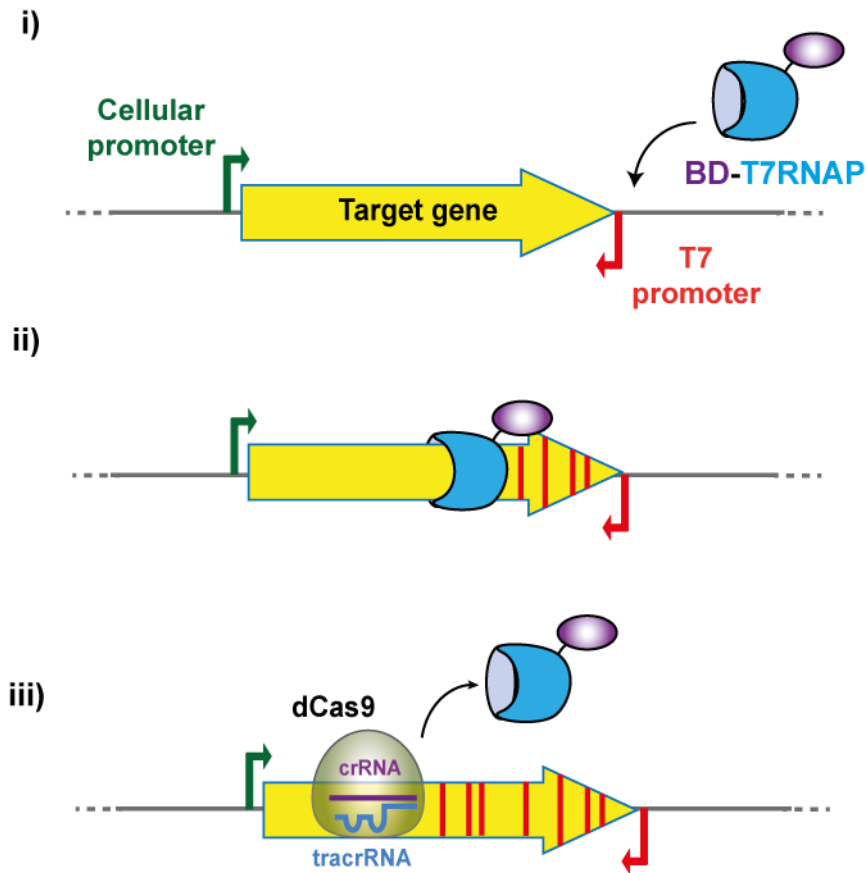

868

869

870

871 **Figure 1.** Schematic representation of the mutagenic process. The T7 RNA polymerase

872 of the fusion specifically binds the T7 promoter (i), initiating the transcription and

873 moving along the target gene carrying the base deaminase (BD) that creates mutations

874 (red stripes) in this gene (ii). The enzymatic fusion stops and detaches from the DNA

875 when encounters a dCas9 molecule bound to a specific sequence determined by the

876 crRNA (iii).

877

878

879

880

881

882

883

884

885

886  
887  
888

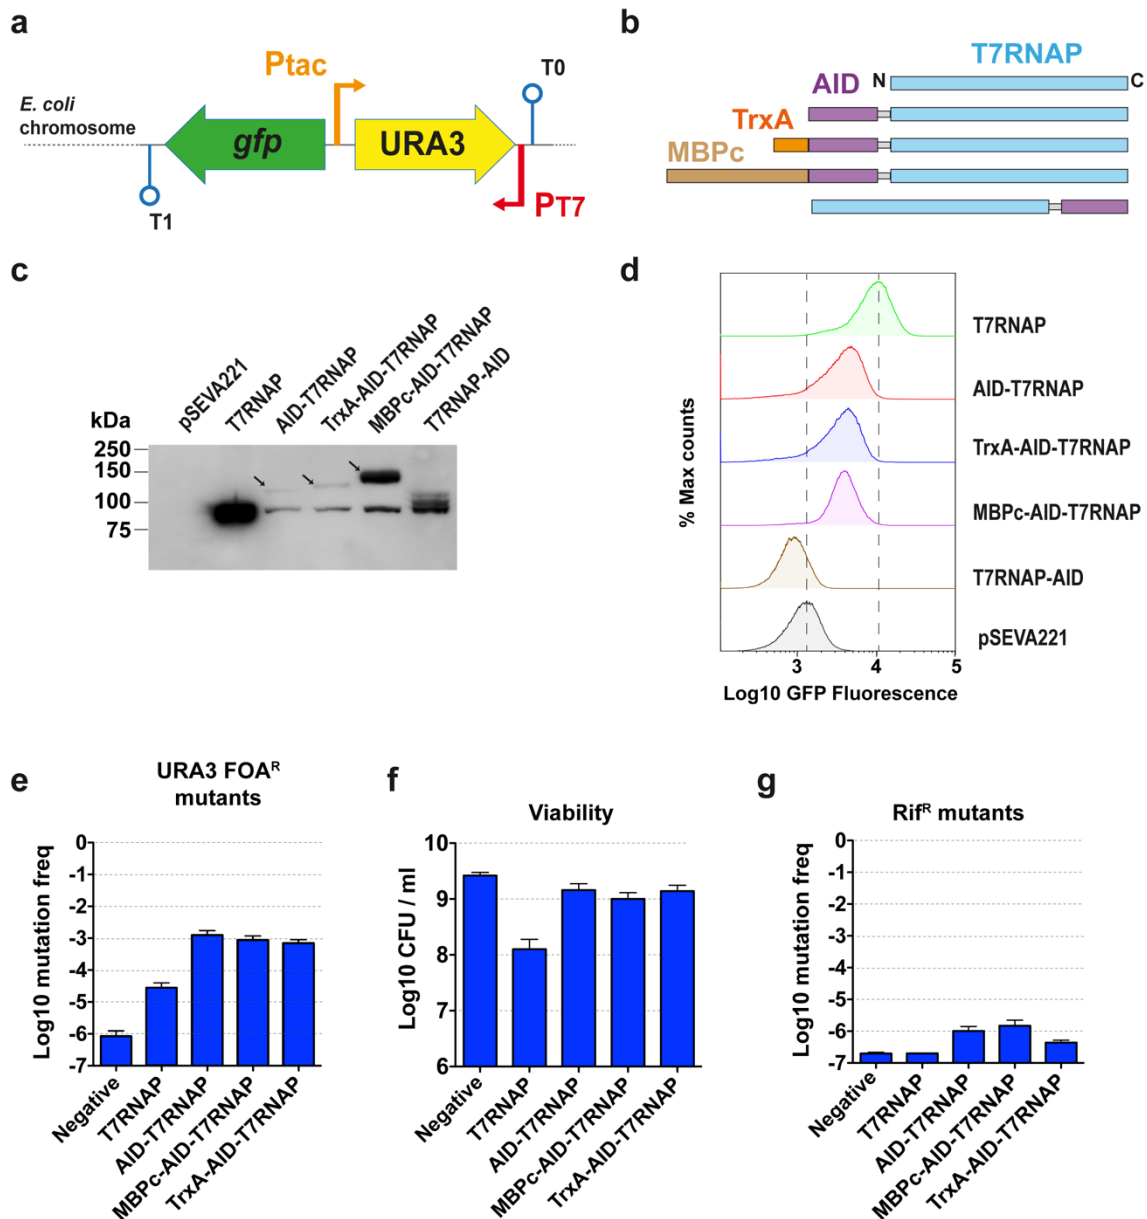

889  
890  
891  
892  
893  
894  
895  
896  
897  
898  
899  
900  
901  
902  
903  
904

**Figure 2.** Expression and activity of the different variants of the fusion AID-T7RNAP. (a) Representation of the chromosomally integrated reporter cassette to test the mutagenesis system. Thin arrows indicate the promoters  $tac$  ( $P_{tac}$ ) and T7 ( $P_{T7}$ ), lollipops indicate terminators T0 and T1. (b) Representation of the different AID fusion variants. (c) Expression of the different variants determined by Western blot analysis of the cell extracts from induced cultures of the strain  $MG^*-URA3\Delta_{ung}$  transformed with the different plasmids. The arrows indicate the bands corresponding to the full-length fusions. (d) Processivity of the fusions assessed by flow cytometry analysis to detect expression of *gfp* in the induced cultures. (e) Mutation frequency of URA3 as the ratio of FOA<sup>R</sup> CFU/ml vs. total CFU/ml. (f) Viability as Log<sub>10</sub> CFU/ml. (g) Mutation frequency of *rpoB* as the ratio of Rif<sup>R</sup> CFU/ml vs. total CFU/ml. The histograms (e, f and g) represent the means and standard errors of three independent experiments (n=3).



905  
906  
907  
908

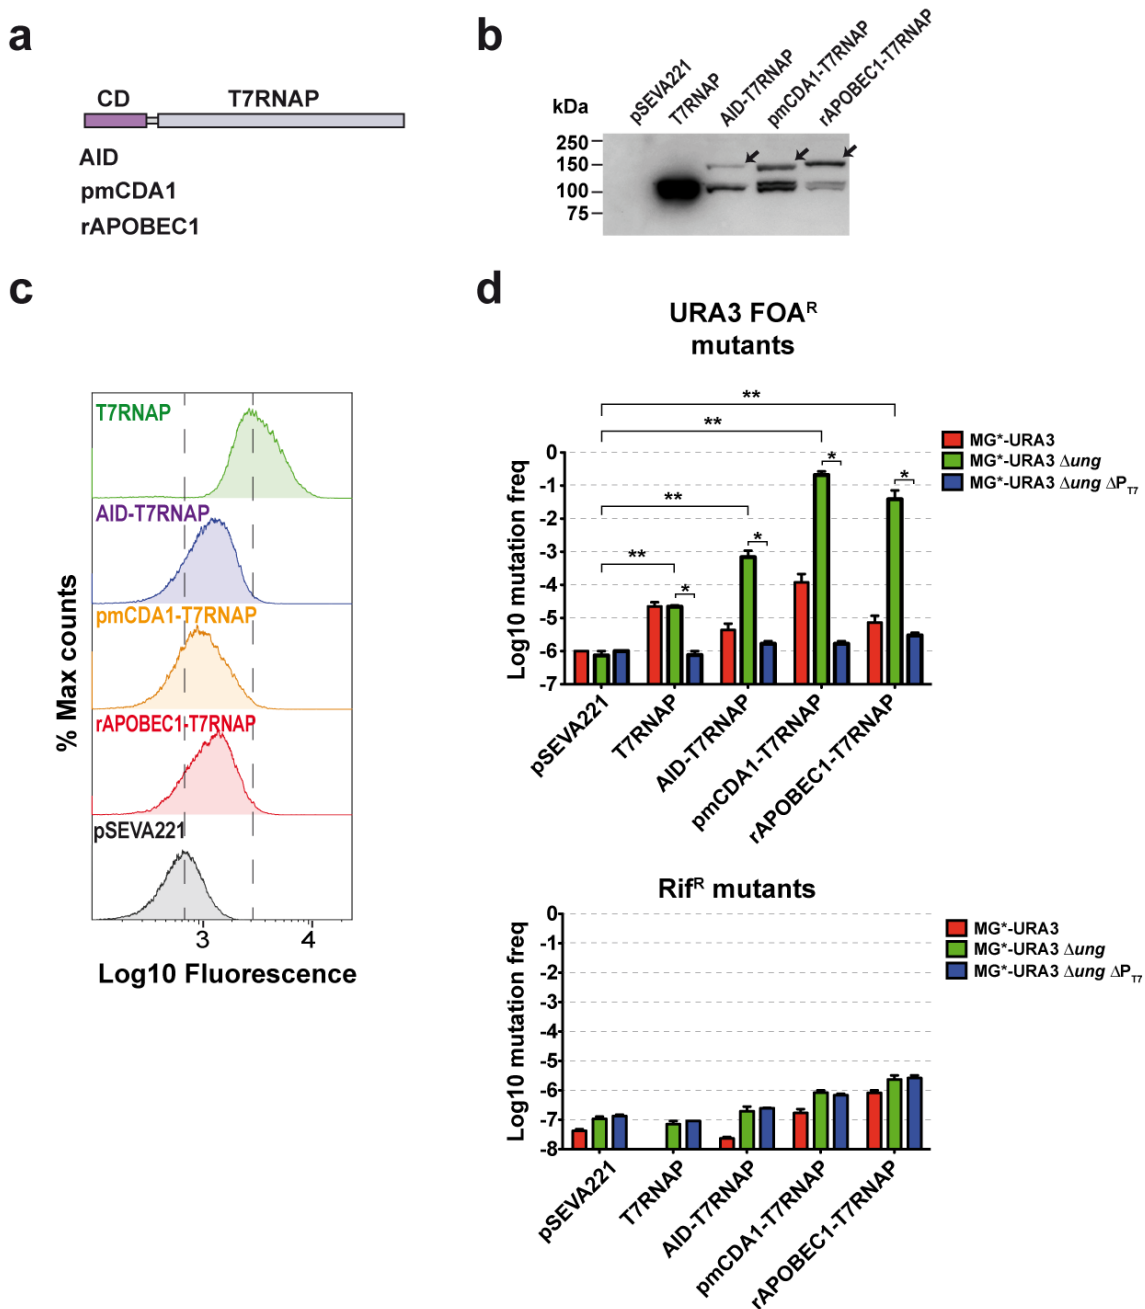

909  
910  
911  
912  
913  
914  
915  
916  
917  
918  
919  
920

**Figure 3.** Expression and mutagenic activity of AID-T7RNAP, pmCDA1-T7RNAP and rAPOBEC1-T7RNAP. (a) Scheme of the different CDs fused to the T7 RNA polymerase by the linker (G<sub>3</sub>S)<sub>7</sub>. (b) Expression of the different fusions determined by Western blot analysis of the cell extracts from induced cultures of the strain MG<sup>\*</sup>-URA3 $\Delta$ ung. (c) Processivity of the fusions assessed by flow cytometry analysis to detect expression of GFP in the induced cultures. (d) Mutagenic activity in URA3 and *rpoB* of the different fusions using as hosts MG<sup>\*</sup>-URA3, MG<sup>\*</sup>-URA3 $\Delta$ ung and MG<sup>\*</sup>-URA3 $\Delta$ ung $\Delta$ P<sub>T7</sub>. The histograms represent the means and standard errors of at least three independent experiments (n $\geq$ 3). The statistical analysis was done using Mann Whitney test. Asterisks indicate p-value < 0.05 (\*) and p-value < 0.01 (\*\*).

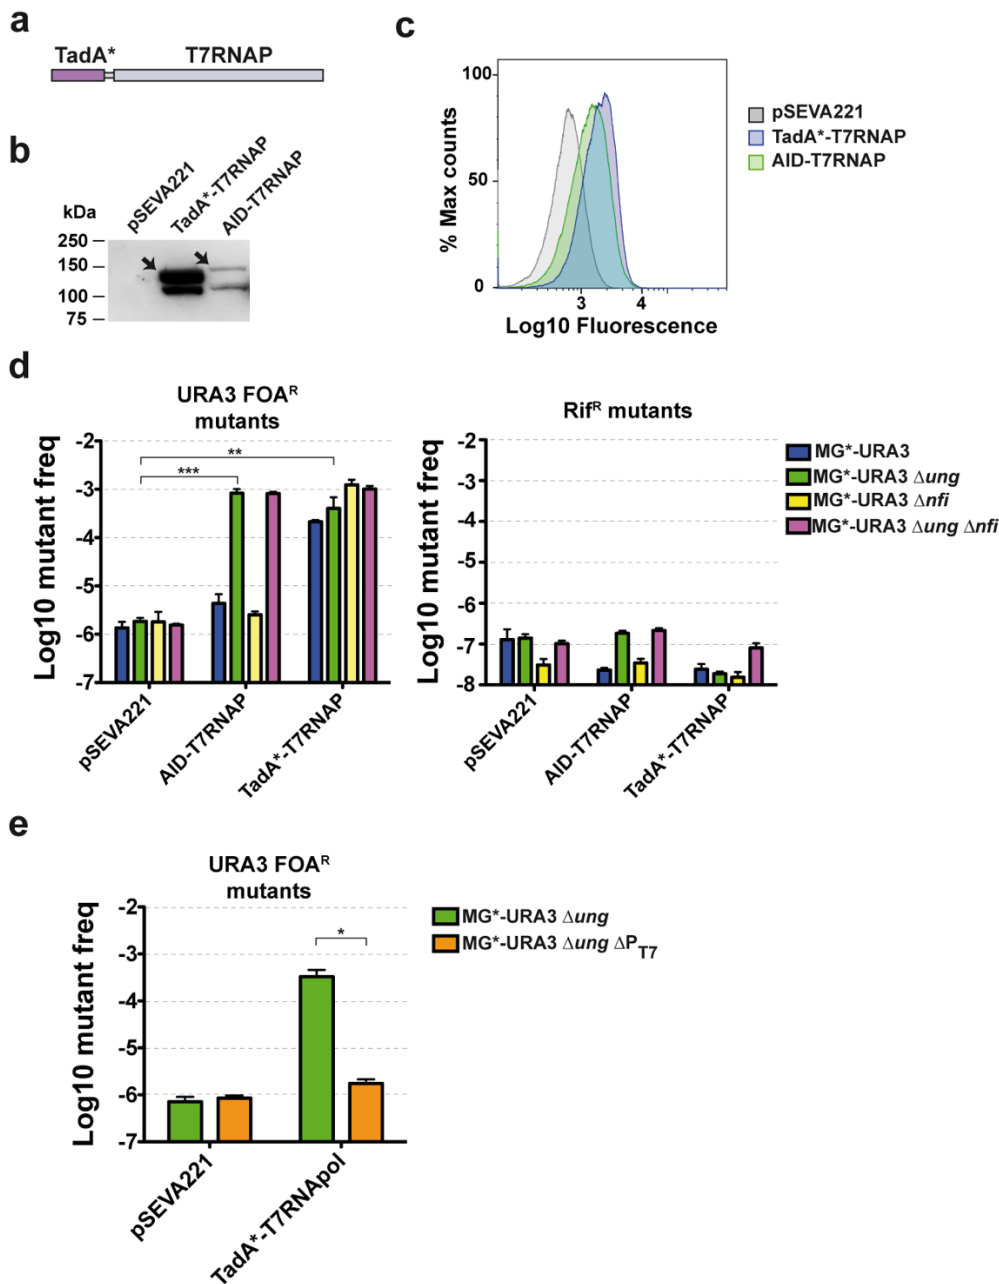

921  
922

923 **Figure 4.** Expression and activity of TadA\*-T7RNAPol. (a) Scheme of the fusion  
924 TadA\*-T7RNAP with the linker (G<sub>3</sub>S)<sub>7</sub>. (b) Expression of the fusion TadA\*-T7RNAP in  
925 comparison to AID-T7RNAP determined by Western blot analysis of cell extracts from  
926 induced cultures. (c) Processivity of the fusions assessed by flow cytometry analysis to  
927 detect expression of GFP in the induced cultures. (d) Mutagenic activity of the AID- and  
928 TadA\*-T7RNAP fusions in URA3 and *rpoB* using as hosts MG\*-URA3, MG\*-  
929 URA3 $\Delta ung$ , MG\*-URA3 $\Delta nfi$  and MG\*-URA3 $\Delta ung \Delta nfi$ . The histograms represent the  
930 means and standard errors of three independent experiments (n=3). (e) Mutagenesis  
931 frequency in URA3 when TadA\*-T7RNAP is expressed in MG\*-URA3 $\Delta ung$  and MG\*-  
932 URA3 $\Delta ung \Delta P_{T7}$ . The histograms represent the means and standard errors of at least  
933 four independent experiments (n $\geq$ 4). Asterisks indicate p-value < 0.05 (\*), p-value <  
934 0.01 (\*\*) and p-value < 0.001 (\*\*\*).

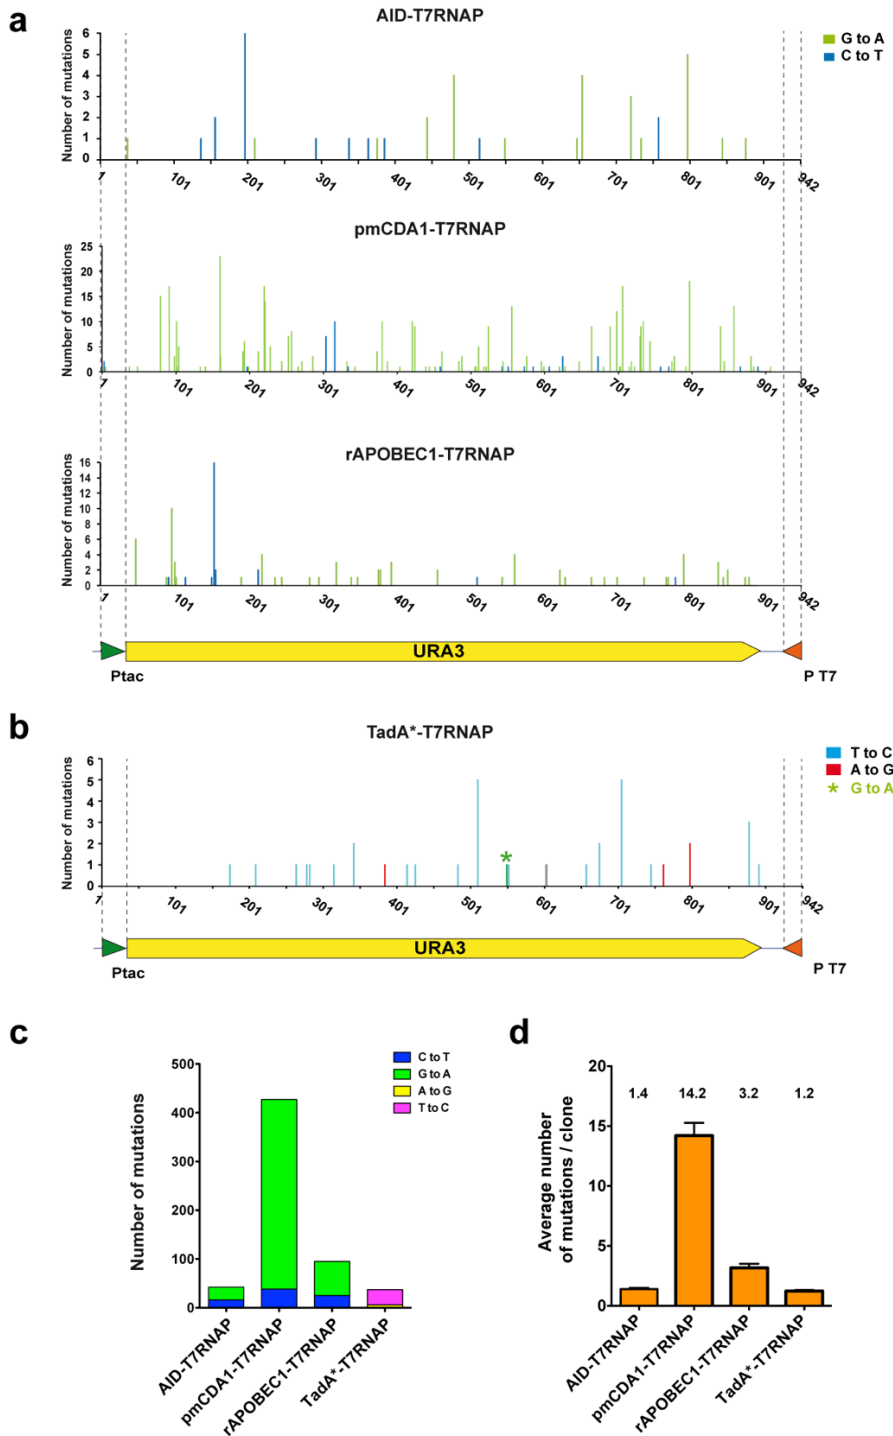

935  
936

937 **Figure 5.** Characterization of URA3 mutations found in FOA<sup>R</sup> colonies expressing BD-  
938 T7RNAP fusions. (a) Number of mutations per nucleotide identified in the URA3 locus  
939 from 30 FOA<sup>R</sup>-colonies isolated from each MG<sup>\*</sup>-URA3Δung strain expressing the  
940 indicated CD-T7RNAP fusions and (b) from MG<sup>\*</sup>-URA3ΔungΔnfi strain expressing  
941 TadA\*-T7RNAP fusion. The promoters Ptac and T7 are shown with arrow heads and  
942 delimited by dashed lines. The indicated base changes correspond to the coding  
943 sequence of URA3. Different base substitutions found are labeled with the color codes  
944 on the right. A single G to A transition found with TadA\*-T7RNAP is labelled with an  
945 asterisk. (c) Total number of mutations for each BD-T7RNAP fusion indicating the base  
946 substitutions found. (d) Average number of mutations per clone found in the FOA<sup>R</sup>-  
947 colonies analyzed for each of the indicated BD-T7RNAP fusions.

948

949

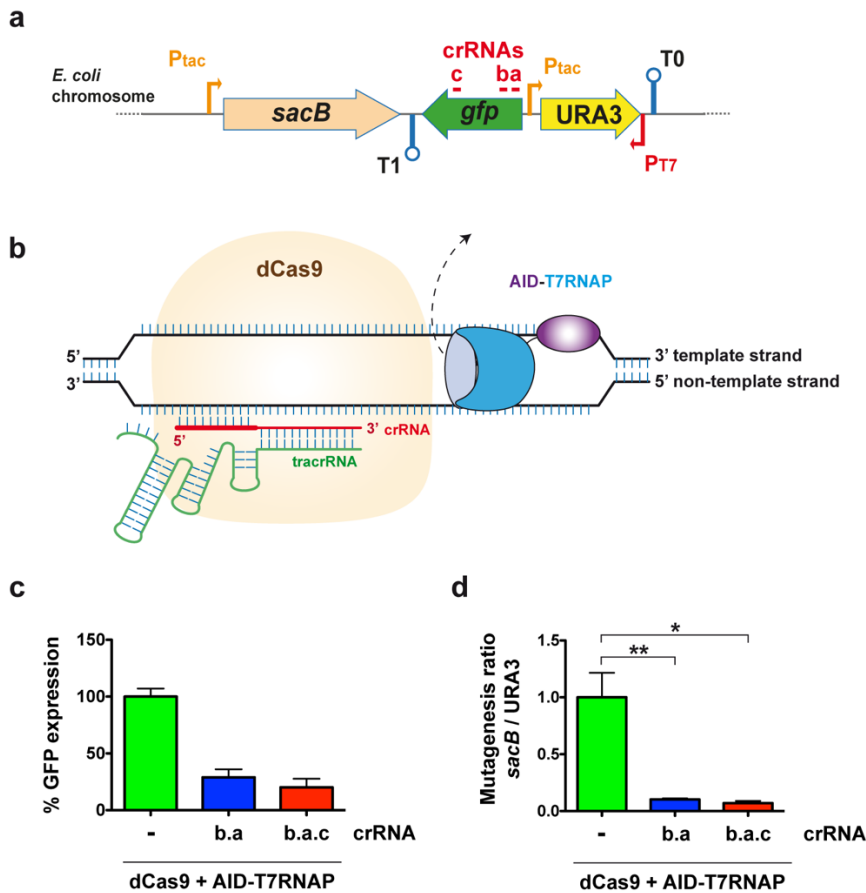

950

951

952

**Figure 6.** Blocking AID-T7RNAP elongation and mutagenic activity by dCas9 and crRNAs. **(a)** Scheme of the reporter cassette with *sacB* integrated in MG<sup>\*</sup>-SacB-*URA3ΔungΔnfi* strain. Thin arrows indicate the tac ( $P_{tac}$ ) and T7 ( $P_{T7}$ ) promoters, lollipop indicates terminators T0 and T1, and red lines mark targeting sequences of the crRNAs a, b and c. **(b)** Representation of the dCas9 blocking activity showing one crRNA (in red) targeting the non-template strand relative to T7RNAP transcription. The mutagenic protein fusion is displaced from the transcription bubble (dashed arrow) by bound dCas9/crRNA. **(c)** Relative GFP levels measured by flow cytometry of bacteria from strain MG<sup>\*</sup>-SacB-*URA3ΔungΔnfi* expressing AID-T7RNAP and dCas9 in the absence (-) or presence of crRNA arrays b.a and b.a.c. The histogram shows the percentages of mean fluorescence intensities (MFI) for each condition relative to the strain lacking crRNAs. Background GFP fluorescence signals from this strain with pdCas9 and the empty vector pSEVA221 are subtracted from all values. **(d)** Ratio of mutagenesis of *sacB* vs. *URA3* in bacteria MG<sup>\*</sup>-SacB-*URA3ΔungΔnfi* expressing AID-T7RNAP and dCas9 in the absence (-) or presence of crRNA arrays b.a and b.a.c. The ratio found in bacteria lacking crRNAs are considered 1. For **(c)** and **(d)**, the histograms represent the relative means and standard errors from at least three independent experiments ( $n \geq 3$ ). The statistical analysis was done using two-tailed Student t test. Asterisks indicate p-value < 0.05 (\*), p-value < 0.01 (\*\*).

972

973
